# Supplementary material for: Targeting Exosomal EBV-LMP1 Transfer and miR-203 Expression via the NF-κB Pathway: The Therapeutic Role of Aspirin in NPC
Source: PubMed Central journal article supplement — Mol Ther Nucleic Acids. 2019 Jun 7;17:175–84. doi: 10.1016/j.omtn.2019.05.023 (PMC6610683; doi:10.1016/j.omtn.2019.05.023), 2019-06-07
Supplement: mmc1.pdf [file mmc1.pdf]

OMTN, Volume 17

## **Supplemental Information**

**Targeting Exosomal EBV-LMP1 Transfer  
and miR-203 Expression via the NF- $\kappa$ B Pathway:**

**The Therapeutic Role of Aspirin in NPC**

**Lielian Zuo, Yan Xie, Jinyong Tang, Shuyu Xin, Lingzhi Liu, Siwei Zhang, Qijia Yan, Fanxiu Zhu, and Jianhong Lu**

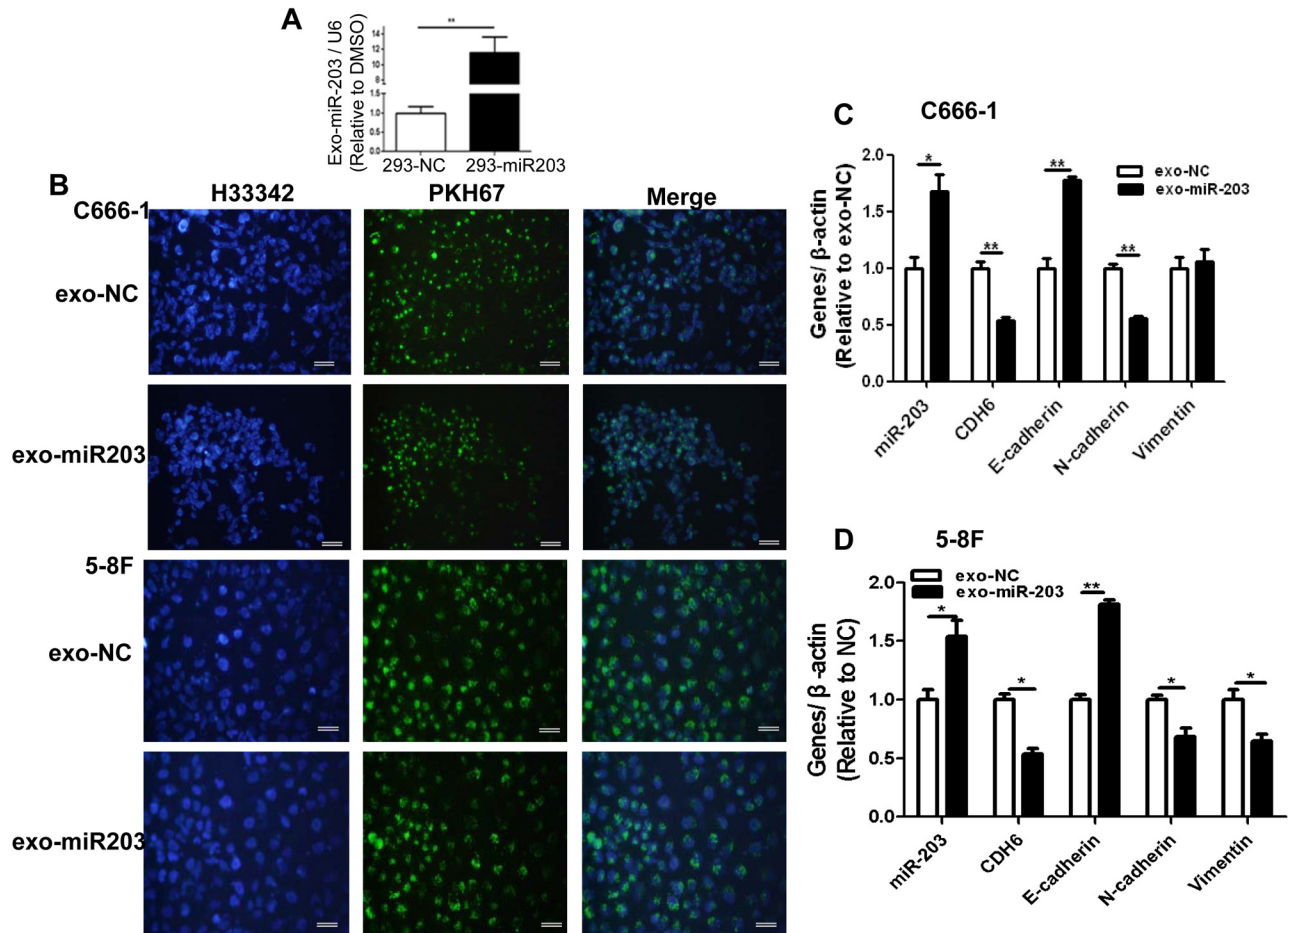

**Figure S1. Exosomal miR-203 uptake inhibits EMT potential in recipient NPC cells.** (A) The detection of exosome miR-203 by qPCR. The exosomes (Exo) were derived from 293-miR203 and 293-NC control cells respectively. (B) NPC C666-1 or 5-8F cells co-cultured with exo-miR203. Green indicates PKH67-labelled exosomes and blue indicates cell nuclei with H33342 staining. Scale bar, 50 $\mu$ m. (C) The detection of miR-203, CDH6, and the EMT markers in C666-1 cells by qPCR after co-culture. (D) The detection of miR-203, CDH6, and the EMT markers in 5-8F cells after co-culture. The results are the means  $\pm$  SD (n = 3). \*p < 0.05, \*\* p<0.01.

**Table S1.****Primers used for qPCR.**

| <b>Gene names</b> | <b>Primer names</b> | <b>Primer sequences</b> |
|-------------------|---------------------|-------------------------|
| LMP1              | LMP1-L              | TGAACACCACCACGATGACT    |
|                   | LMP1-R              | GTGCGCCTAGGTTTTGAGAG    |
| CDH6              | CDH6-L              | TTCCTCAGGGTGCCGATATC    |
|                   | CDH6-R              | GTTGCCATCCTTCTGTGCAT    |
| E-cadherin        | E-cadherin-L        | TTCTGGAAGGAATGGAGGAGTC  |
|                   | E-cadherin-R        | ACCTGGAATTGGGCAAATGTG   |
| N-cadherin        | N-cadherin-L        | GACAATGCCCTCAAGTGTT     |
|                   | N-cadherin-R        | CCATTAAGCCGAGTGATGGT    |
| Vimentin          | Vimentin-L          | AGATGGCCCTTGACATTGAG    |
|                   | Vimentin-R          | TGGAAGAGGCAGAGAAATCC    |
| $\beta$ -actin    | $\beta$ -actin-L    | TCACCAACTGGGACGACATG    |
|                   | $\beta$ -actin-R    | GTCACCGGAGTCCATCACGAT   |
